# Supplementary material
Source: Springer Nature journal article supplement (https://www.springermedizin.de/resource/supplementary/12890_2012_650_MOESM7_ESM.pdf/9505512)
Supplement: MOESM7 [file 9505512]

**a.**

LS Mean Difference (and 95% CI) from Placebo (L)

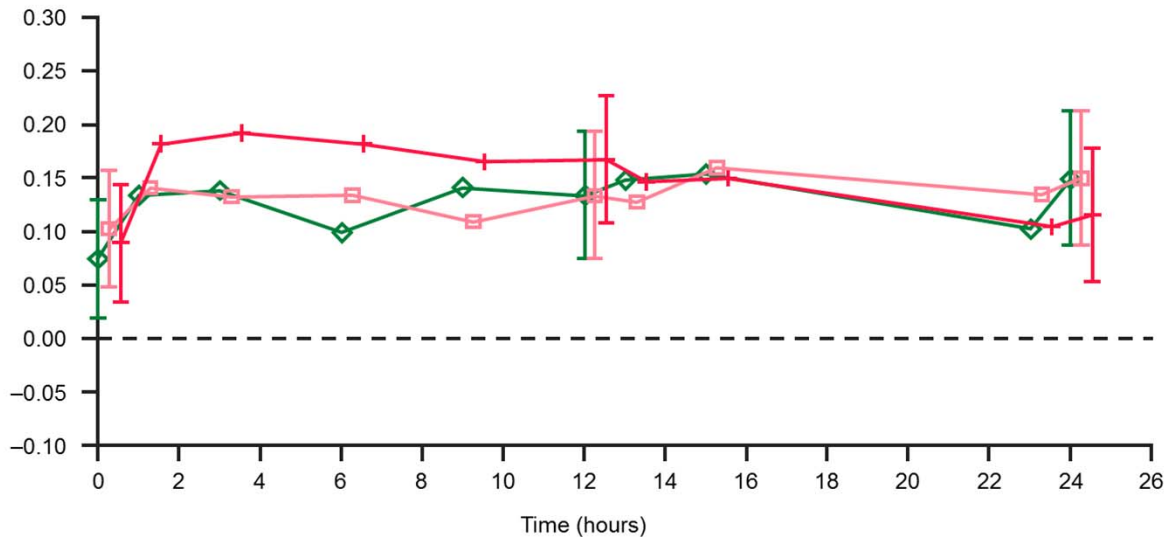**b.**

LS Mean Difference (and 95% CI) from Placebo (L)

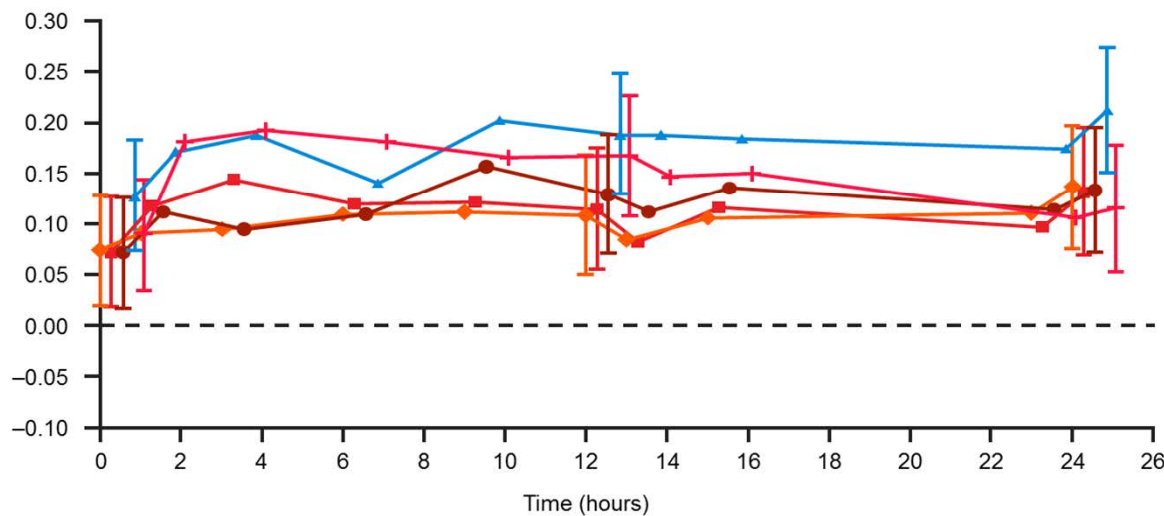

15.6mcg QD

62.5mcg QD

Tio

31.25mcg QD

125mcg QD
